# Supplementary material
Source: PubMed Central journal article supplement (PMC6628200)
Supplement: NIHMS1036761-supplement-Supporting.pdf [file NIHMS1036761-supplement-Supporting.pdf]

# Localization of Cyclopropane Modifications in Bacterial Lipids via 213 nm Ultraviolet Photodissociation Mass Spectrometry

Molly S. Blevins, Dustin R. Klein, and Jennifer S. Brodbelt\*

Department of Chemistry, University of Texas at Austin, Austin, TX 78712, United States

\*Corresponding author: [jbroadbelt@cm.utexas.edu](mailto:jbroadbelt@cm.utexas.edu)

## Supporting Information

### Table of Contents

| Content                                                                                                                          | Page no. |
|----------------------------------------------------------------------------------------------------------------------------------|----------|
| 1. Possible fragmentation pathway for UVPD of cyclopropane rings in bacterial lipids                                             | S-2      |
| 2. <i>In vivo</i> generation of bacterial cyclopropane glycerophospholipid from double bond precursor                            | S-3      |
| 3. Structures of all cyclopropane lipid standards                                                                                | S-4      |
| 4. MS1 spectra of PE (16:0/17:1(c9Z)) and PC (16:0/17:1(c9Z)) with corresponding structures                                      | S-5      |
| 5. Calibration curve for PE (16:0/17:1(c9Z)) cyclopropane diagnostic ion LC/UVPD-MS peak areas as a function of injection amount | S-6      |
| 6. HCD spectrum of $\alpha$ -MA (C-80(c16Z, c32Z)) with fragment ion map                                                         | S-7      |
| 7. Comparison of 193 and 213 nm UVPD for cyclopropane localization in PE (16:0/17:1(c9Z))                                        | S-8      |
| 8. HCD and UVPD spectra of methoxy-MA of <i>m/z</i> 1224 with corresponding fragment ion maps                                    | S-9      |
| 9. LC-MS base peak chromatogram of <i>Mtb</i> H37rV lipid extract                                                                | S-10     |
| 10. LC-MS base peak chromatograms of <i>Mtb</i> HN878 and CDC1551 lipid extracts with corresponding lists of identified MAs      | S-11     |

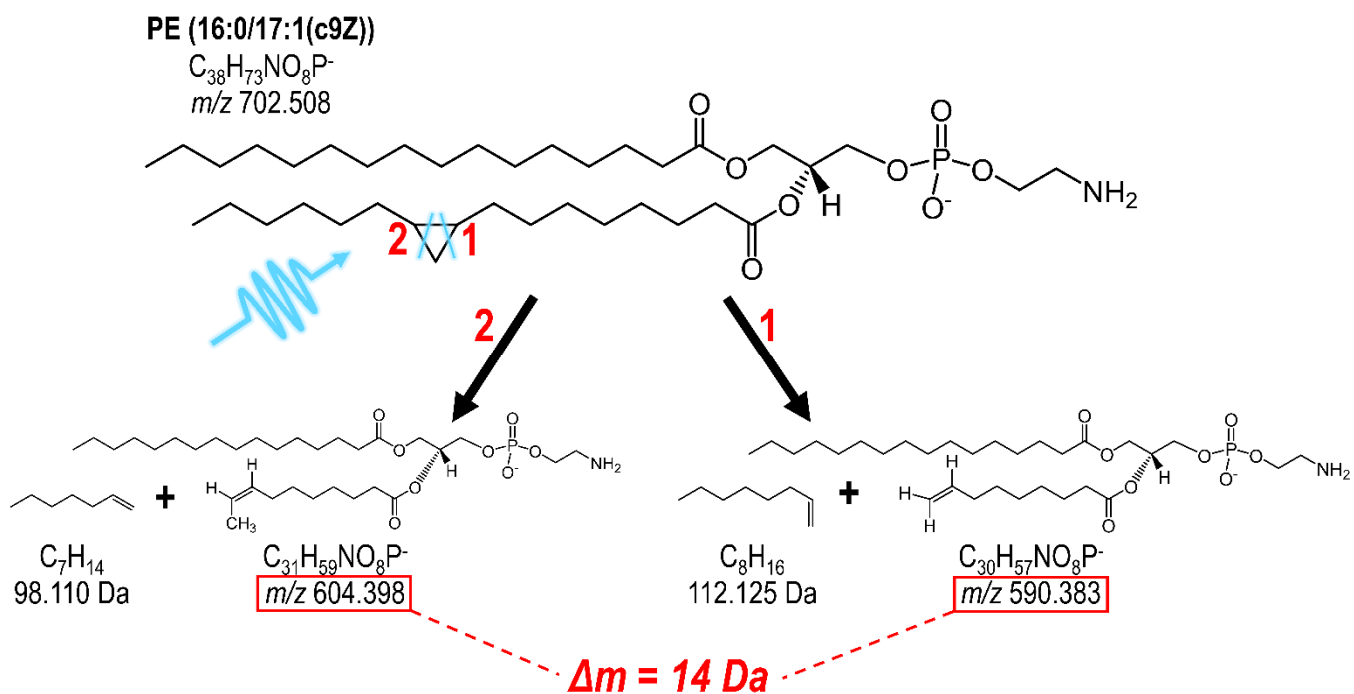

**Scheme S1.** Possible fragmentation pathway for UVPD of cyclopropane rings in bacterial lipids with example shown for PE (16:0/17:1(c9Z)). Boxed products will be detected via MS as depicted product ions retains the phospholipid headgroup, differing by  $CH_2$  and accounting for an observed mass difference of 14 Da

## PE (16:0/16:1(9Z))

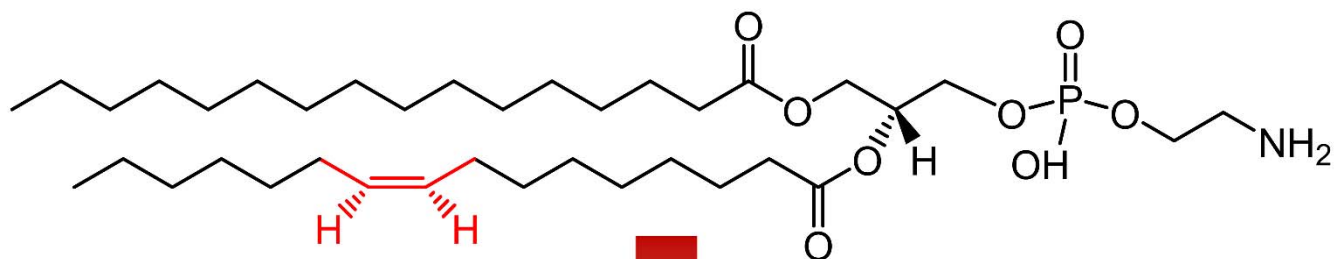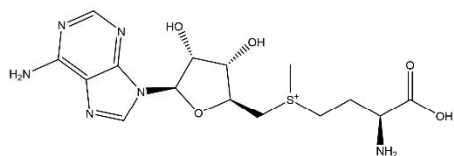

*S*-adenosylmethionine

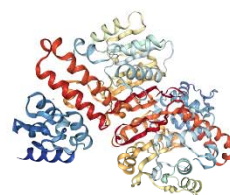

Cyclopropane  
Synthase

## PE (16:0/17:1(c9Z))

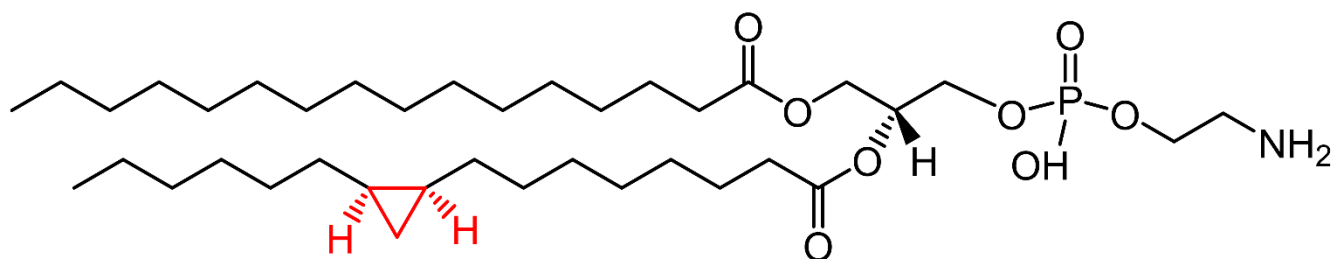

**Scheme S2.** *In vivo* generation of bacterial cyclopropane glycerophospholipid from double bond precursor via *S*-adenosylmethionine methylene addition and cyclopropane synthase catalysis (PDB entry 6BQC)

| Lipid Name                                                                                                                                                                               | Lipid Structure | Exact Mass (Da) |
|------------------------------------------------------------------------------------------------------------------------------------------------------------------------------------------|-----------------|-----------------|
| (2R)-3-(((2-aminoethoxy)(hydroxy)phosphoryl)oxy)-2-((8-((1S,2R)-2-hexylcyclopropyl)octanoyl)oxy)propyl palmitate<br><b>PE (16:0/17:1(c9Z))</b>                                           |                 | <b>703.515</b>  |
| 2-((((R)-2-((8-((1S,2R)-2-hexylcyclopropyl)octanoyl)oxy)-3-(palmitoyloxy)propoxy)(hydroxy)phosphoryl)oxy)-N,N,N-trimethylethan-1-aminium<br><b>PC (16:0/17:1(c9Z))</b>                   |                 | <b>746.569</b>  |
| (2R)-2-((1R)-1-hydroxy-14-(2-(14-(2-octadecylcyclopropyl)tetradecyl)cyclopropyl)tetradecyl)hexacosanoic acid compound with dihydrogen (1:24)<br><b>α-mycolic acid (C-80(c16Z, c32Z))</b> |                 | <b>1137.174</b> |

**Table S1.** Structures of all cyclopropane lipid standards



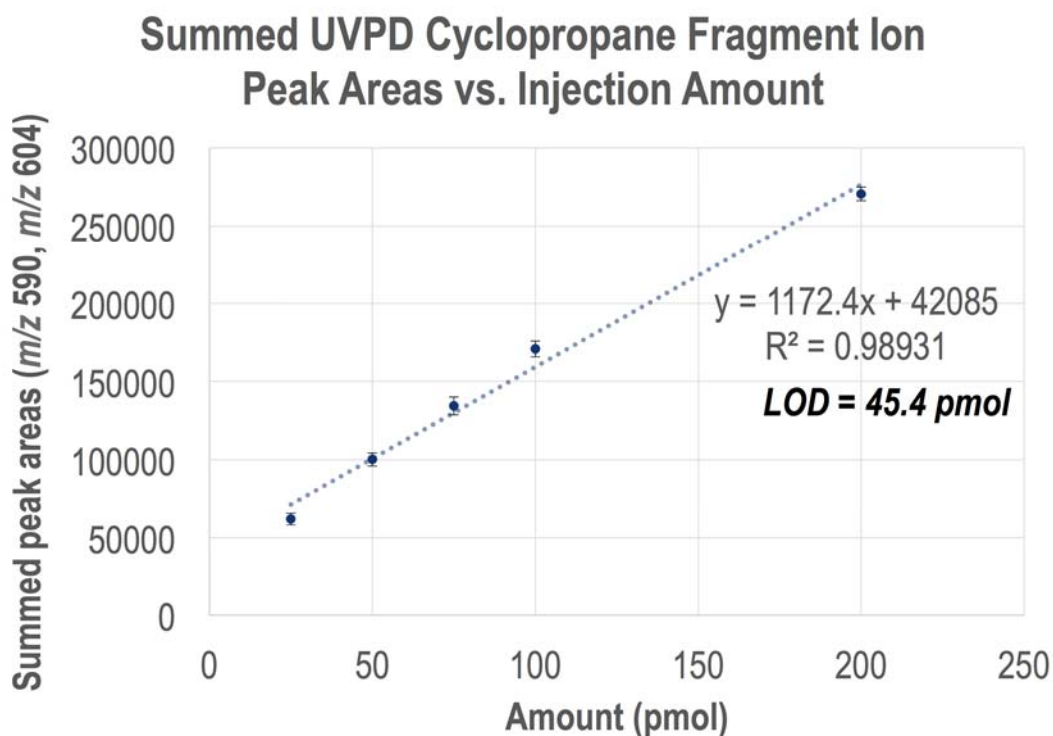

**Figure S2.** Calibration curve for PE (16:0/17:1(c9Z)) based on detection of diagnostic ions (m/z 590 and 604) from negative ion mode 213 nm LC/UVPD-MS enabling determination of LOD as 45 pmol. Calibration curve was generated based on linear regression analysis of peak areas with seven-point boxcar smoothing over the range of 20 to 200 pmol with S/N=3 and LOD experiments were performed using an activation period of 100 msec (corresponding to 250 pulses) and performed in triplicate as indicated by error bars included on the graph. For this LOD measurement, the UVPD efficiency of caffeine used to calibrate and optimize UVPD performance was measured as 25% using 125 laser pulses (50 ms activation period).

**$\alpha$ -mycolic acid (C-80(c16Z, c32Z))**  
 $m/z$  1164.20

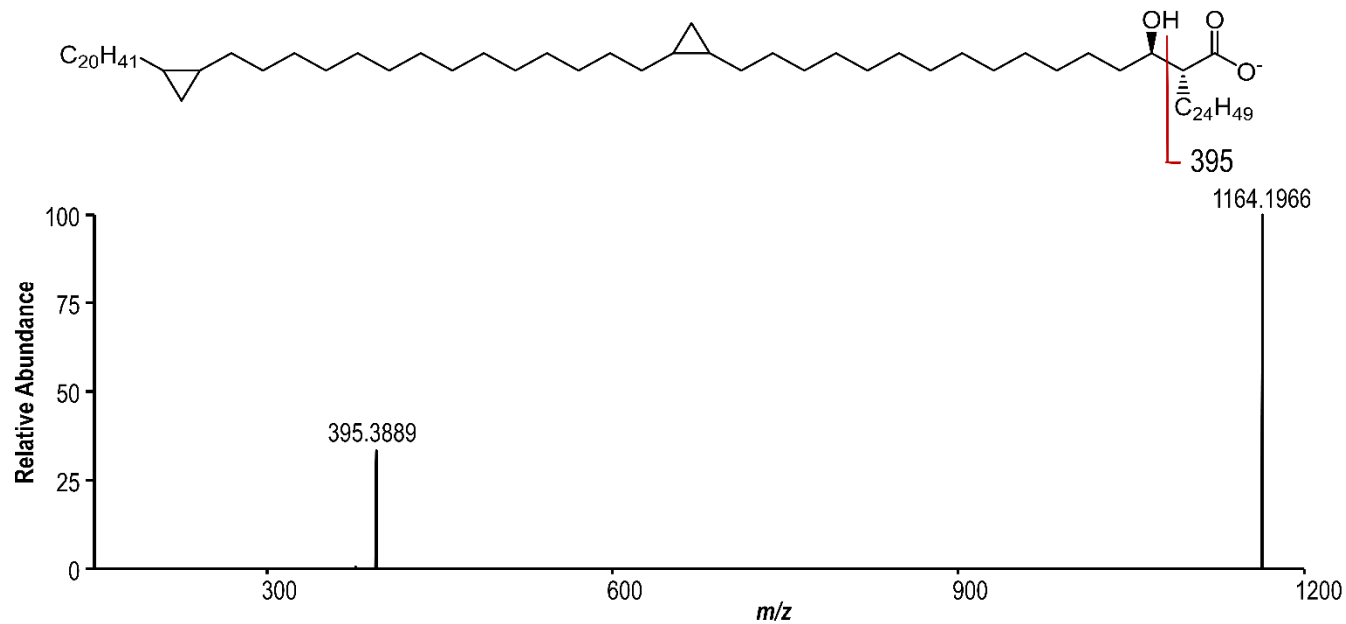

**Figure S3.** Negative mode HCD spectrum of  $\alpha$ -mycolic acid (C-80(c16Z, c32Z)) with corresponding fragment ion map.

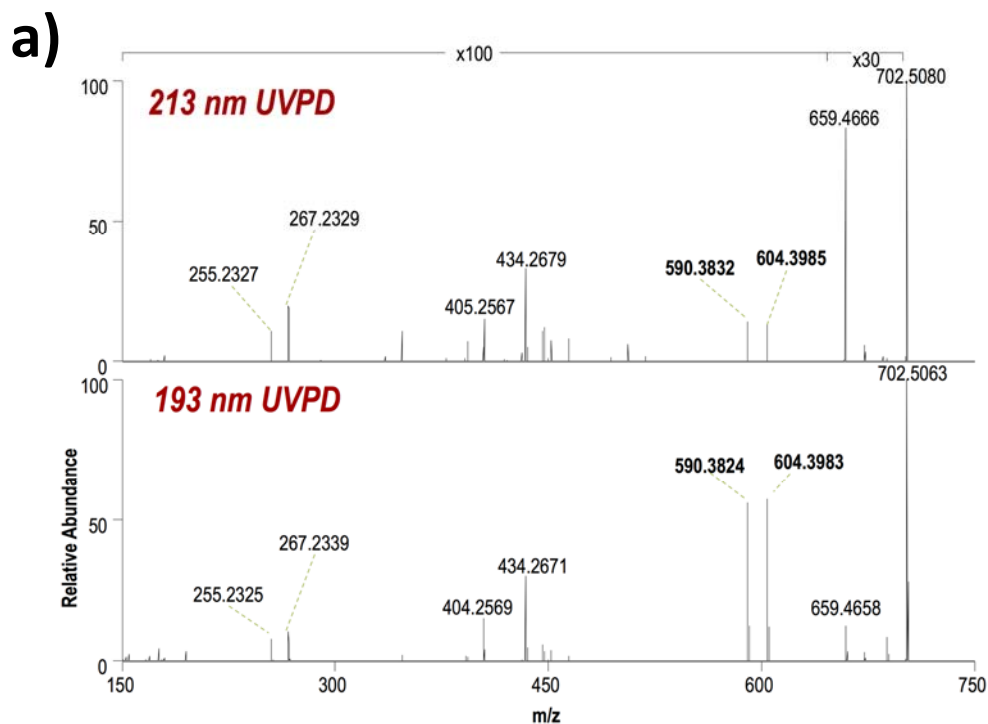

**b)**

| Wavelength (nm)                                                          | 213                                                        | 193                                                    |
|--------------------------------------------------------------------------|------------------------------------------------------------|--------------------------------------------------------|
| Activation parameters                                                    | 500 pulses<br>1.5 uJ per pulse<br>200 ms activation period | 10 pulses<br>5 mJ per pulse<br>20 ms activation period |
| Abundance of precursor prior to UVPD (m/z 702.5)                         | 111,093,064                                                | 29,162,016                                             |
| Summed abundances of diagnostic ions (m/z 590 and 604)                   | 167,758                                                    | 318,411                                                |
| Fragmentation efficiency (%)<br>(fragment abundance/precursor abundance) | 0.2                                                        | 1.1                                                    |

**Figure S4. a)** Comparison of negative mode 193 and 213 nm UVPD spectra of PE (16:0/17:1(c9Z)) of precursor  $m/z$  702 with cyclopropane diagnostic ions of  $m/z$  590 and  $m/z$  604 labelled in bold font. The 100X magnification applies to both spectra. **b)** Summary of 193 and 213 nm UVPD parameters along with fragment-to-precursor ratio showing higher efficiency of 193 nm UVPD compared to 213 nm UVPD. For each type of UVPD, the laser is unfocused.



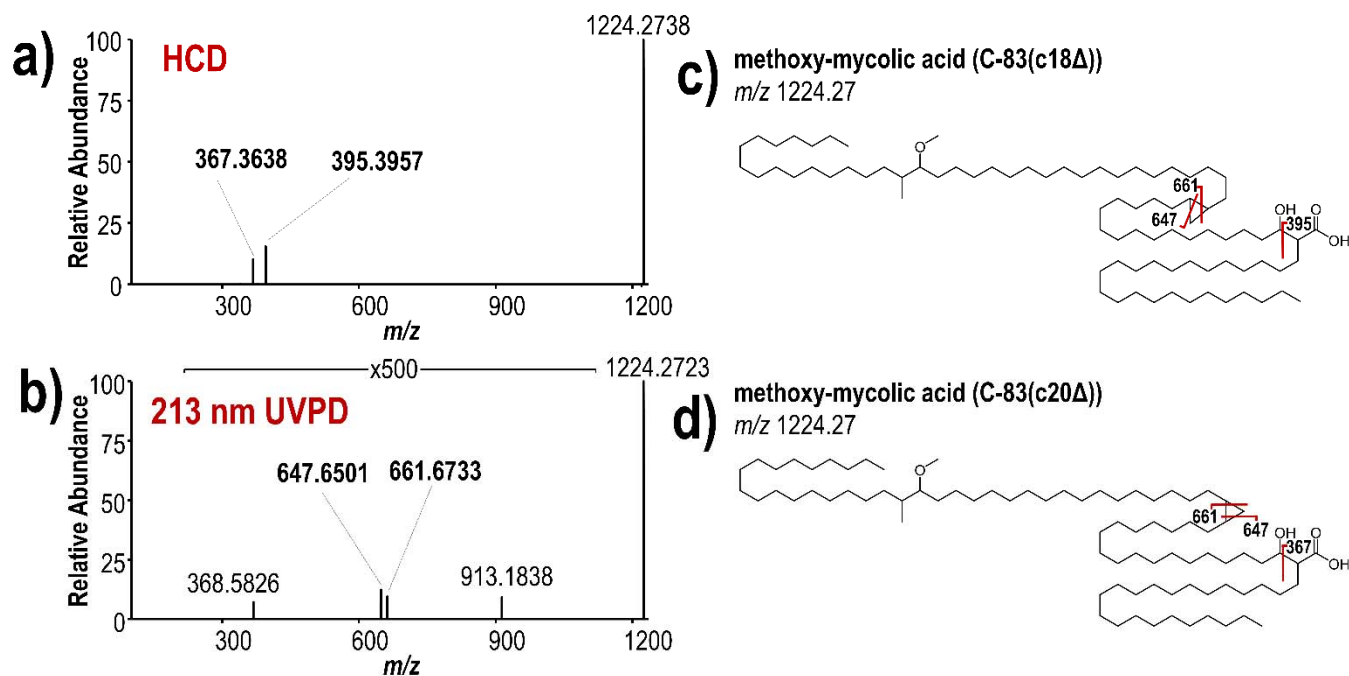

**Figure S5.** **a)** HCD and **b)** 213 nm UVPD spectra of methoxy-mycolic acid of  $m/z$  1224 in negative ion mode and corresponding structural identifications with fragment maps: **c)** methoxy-mycolic acid (C-83(c18 $\Delta$ )) and **d)** methoxy-mycolic acid (C-83(c20 $\Delta$ )).

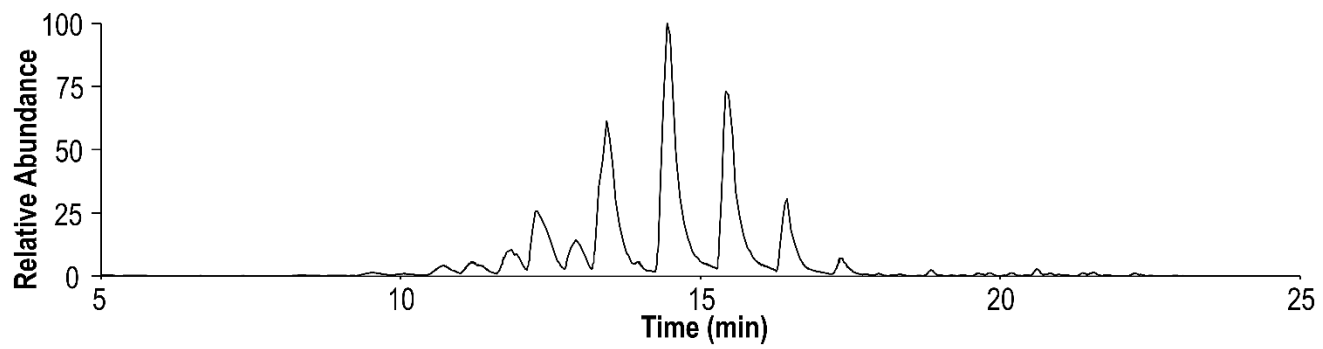

**Figure S6.** Negative mode LC-MS base peak chromatogram of *Mtb* H37rV lipid extract.

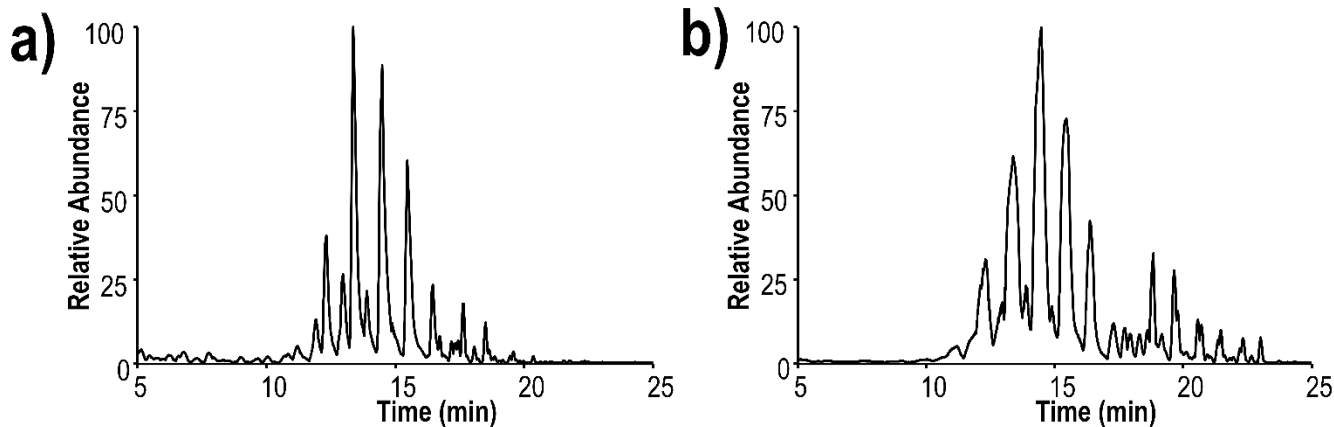

**c)**

| m/z [M-H] <sup>-</sup> | Chemical Formula                                | MA Class | m/z R <sub>2</sub> (α branch) | C <sub>19:0</sub> stat |                      | Ring position          | C <sub>19:0</sub> stat |                      |                                                  |
|------------------------|-------------------------------------------------|----------|-------------------------------|------------------------|----------------------|------------------------|------------------------|----------------------|--------------------------------------------------|
|                        |                                                 |          |                               | m/z diagnostic ions    |                      |                        | m/z diagnostic ions    |                      | Ring position                                    |
| 1108.1515              | C <sub>78</sub> H <sub>140</sub> O <sub>3</sub> | alpha    | 367, 395                      | 563.5511               | 577.5593             | c12Δ (395), c14Δ (367) | 799.8073<br>813.8130   | 813.8130<br>827.8345 | c28Δ (395), c30Δ (367)<br>c29Δ (395), c31Δ (367) |
| 1136.1825              | C <sub>78</sub> H <sub>132</sub> O <sub>3</sub> | alpha    | 367, 395                      | 591.5862               | 605.5973             | c14Δ (395), c16Δ (367) | 827.8345<br>827.8371   | 841.8480<br>841.8550 | c30Δ (395), c32Δ (367)<br>c30Δ (395), c32Δ (367) |
| 1164.2151              | C <sub>80</sub> H <sub>150</sub> O <sub>3</sub> | alpha    | 367, 395                      | 619.6111               | 633.6366             | c16Δ (395), c18Δ (367) | 841.8550<br>855.8824   | 855.8824<br>869.8666 | c31Δ (395), c33Δ (367)<br>c32Δ (395), c34Δ (367) |
| 1224.2725              | C <sub>80</sub> H <sub>160</sub> O <sub>4</sub> | methoxy  | 367, 395                      | 647.6436               | 661.6670             | c18Δ (395), c20Δ (367) | -                      | -                    | -                                                |
| 1252.3030              | C <sub>80</sub> H <sub>160</sub> O <sub>4</sub> | methoxy  | 395                           | 675.6806               | 689.7073             | c20Δ                   | -                      | -                    | -                                                |
| 1278.3196              | C <sub>80</sub> H <sub>170</sub> O <sub>4</sub> | keto     | 395                           | 661.6498               | 675.6744             | c19Δ                   | -                      | -                    | -                                                |
| 1280.3351              | C <sub>87</sub> H <sub>172</sub> O <sub>4</sub> | methoxy  | 395                           | 675.6864<br>689.7028   | 689.7028<br>703.6973 | c20Δ<br>c21Δ           | -                      | -                    | -                                                |
| 1294.3502              | C <sub>88</sub> H <sub>174</sub> O <sub>4</sub> | methoxy  | 395                           | 703.6973<br>661.6572   | 717.7114<br>675.6744 | c22Δ<br>c19Δ           | -                      | -                    | -                                                |

**d)**

| m/z [M-H] <sup>-</sup> | Chemical Formula                                | MA Class | m/z R <sub>2</sub> (α branch) | C <sub>19:0</sub> stat |                      | Ring position                                    | C <sub>19:0</sub> stat |                      |                                                                          |
|------------------------|-------------------------------------------------|----------|-------------------------------|------------------------|----------------------|--------------------------------------------------|------------------------|----------------------|--------------------------------------------------------------------------|
|                        |                                                 |          |                               | m/z diagnostic ions    |                      |                                                  | m/z diagnostic ions    |                      | Ring position                                                            |
| 1108.1520              | C <sub>78</sub> H <sub>140</sub> O <sub>3</sub> | alpha    | 339, 367, 395                 | 563.5494               | 577.5612             | c12Δ (395), c14Δ (367), c16Δ (339)               | 799.8046<br>813.8129   | 813.8129<br>827.8302 | c28Δ (395), c30Δ (367), c32Δ (339)<br>c29Δ (395), c31Δ (367), c33Δ (339) |
| 1136.1833              | C <sub>78</sub> H <sub>132</sub> O <sub>3</sub> | alpha    | 367, 395                      | 591.5839               | 605.6035             | c14Δ (395), c16Δ (367)                           | 827.8302<br>827.8284   | 841.8393<br>841.8535 | c30Δ (395), c32Δ (367), c34Δ (339)<br>c30Δ (395), c32Δ (367)             |
| 1164.2148              | C <sub>80</sub> H <sub>150</sub> O <sub>3</sub> | alpha    | 367, 395                      | 619.6184               | 633.6296             | c16Δ (395), c18Δ (367)                           | 841.8535<br>855.8654   | 855.8617<br>869.8852 | c31Δ (395), c33Δ (367)<br>c30Δ (395), c32Δ (367)                         |
| 1224.2728              | C <sub>80</sub> H <sub>160</sub> O <sub>3</sub> | methoxy  | 367, 395                      | 647.6470               | 661.6630             | c18Δ (395), c20Δ (367)                           | -                      | -                    | -                                                                        |
| 1252.3030              | C <sub>80</sub> H <sub>160</sub> O <sub>4</sub> | methoxy  | 367, 395                      | 661.6651<br>675.6806   | 675.6806<br>689.6962 | c19Δ (395), c21Δ (367)<br>c20Δ (395), c22Δ (367) | -                      | -                    | -                                                                        |
| 1280.3350              | C <sub>87</sub> H <sub>172</sub> O <sub>4</sub> | methoxy  | 367, 395                      | 675.6934<br>689.6998   | 689.6998<br>703.7048 | c20Δ (395), c22Δ (367)<br>c21Δ (395), c23Δ (367) | -                      | -                    | -                                                                        |
| 1294.3500              | C <sub>88</sub> H <sub>174</sub> O <sub>4</sub> | methoxy  | 367, 395                      | 703.7048<br>661.6513   | 717.7048<br>675.6749 | c22Δ (395), c24Δ (367)<br>c19Δ (395), c21Δ (367) | -                      | -                    | -                                                                        |
| 1308.3669              | C <sub>88</sub> H <sub>176</sub> O <sub>4</sub> | methoxy  | 395                           | 703.7062               | 717.7184             | c22Δ                                             | -                      | -                    | -                                                                        |
| 1322.3833              | C <sub>90</sub> H <sub>174</sub> O <sub>4</sub> | methoxy  | 367, 395                      | 689.6821               | 703.7161             | c21Δ (395), c23Δ (367)                           | -                      | -                    | -                                                                        |

**Figure S7.** Negative mode LC-MS base peak chromatogram for **a)** *Mtb* HN878 lipid extract and **b)** *Mtb* CDC1551 lipid extract, and list of identified mycolic acids from LC-MS/MS for **c)** *Mtb* HN878 lipid extract and **d)** *Mtb* CDC1551 lipid extract.
